# Supplementary material
Source: Springer Nature journal article supplement (https://www.springermedizin.de/resource/supplementary/12889_2013_6260_MOESM2_ESM.pdf/9498816)
Supplement: MOESM2 [file 9498816]

Box 2: Healthcare consumption and absenteeism per age group during the entire study period

|                                                       | <i>Younger children</i> | <i>Older children</i> | <i>Adults</i>   | <i>Elderly</i> | <i>All ages</i> |
|-------------------------------------------------------|-------------------------|-----------------------|-----------------|----------------|-----------------|
|                                                       | <i>0-4 yo</i>           | <i>5-14 yo</i>        | <i>15-64 yo</i> | <i>≥65 yo</i>  |                 |
|                                                       | <i>(n=50)</i>           | <i>(n=91)</i>         | <i>(n=46)</i>   | <i>(n=14)</i>  | <i>(n=201)</i>  |
| <b>Initial consultation at GP or Pediatrician</b>     |                         |                       |                 |                |                 |
| CONSULTATION AT THE MEDICAL OFFICE                    |                         |                       |                 |                |                 |
| <i>number of patients (% of total patients)</i>       | 50 (100%)               | 91 (100%)             | 46 (100%)       | 14 (100%)      | 201 (100%)      |
| <i>number of contacts (total)</i>                     | 1                       | 1                     | 1               | 1              | 1               |
| <b>Vaccine</b>                                        |                         |                       |                 |                |                 |
| <i>number of patients (% of total patients)</i>       | 2 (4%)                  | 3 (3%)                | 2 (4%)          | 8 (57%)        | 15 (7%)         |
| <b>Follow up contacts with physician investigator</b> |                         |                       |                 |                |                 |
| CONSULTATION AT THE MEDICAL OFFICE                    |                         |                       |                 |                |                 |
| <i>number of patients (% of total patients)</i>       | 6 (12%)                 | 11 (12%)              | 10 (22%)        | 8 (57%)        | 35 (17%)        |
| <i>number of contacts (total)</i>                     | 8                       | 17                    | 15              | 11             | 50              |
| <i>mean ±SD</i>                                       | 1.3±0.8                 | 1.5±0.7               | 1.4±0.5         | 1.4±0.5        | 1.4±0.6         |
| <i>min-max</i>                                        | 1-3                     | 1-3                   | 1-2             | 1-2            | 1-3             |
| CONSULTATION BY TELEPHONE                             |                         |                       |                 |                |                 |
| <i>number of patients (% of total patients)</i>       | 4 (8%)                  | 13 (14%)              | 11 (2%)         | 5 (36%)        | 33 (16%)        |
| <i>number of contacts (total)</i>                     | 7                       | 19                    | 16              | 6              | 48              |
| <i>mean ±SD</i>                                       | 1.7±1.5                 | 1.5±0.9               | 1.5±0.7         | 1.2±0.4        | 1.5±0.8         |
| <i>min-max</i>                                        | 1-4                     | 1-4                   | 1-3             | 1-2            | 1-4             |
| CONSULTATION BY HOME VISIT                            |                         |                       |                 |                |                 |
| <i>number of patients (% of total patients)</i>       | 0                       | 1 (1%)                | 2 (4%)          | 1 (7%)         | 4 (2%)          |
| <i>number of contacts (total)</i>                     | 0                       | 2                     | 3               | 2              | 7               |
| <i>mean ±SD</i>                                       | -                       | -                     | 1.5±0.7         | -              | 1.7±0.5         |
| <i>min-max</i>                                        | -                       | -                     | 1-2             | -              | 1-2             |
| <b>Follow up contacts with other physician</b>        |                         |                       |                 |                |                 |

|                                                 | <i>Younger children</i> | <i>Older children</i> | <i>Adults</i>   | <i>Elderly</i> | <i>All ages</i> |
|-------------------------------------------------|-------------------------|-----------------------|-----------------|----------------|-----------------|
|                                                 | <i>0-4 yo</i>           | <i>5-14 yo</i>        | <i>15-64 yo</i> | <i>≥65 yo</i>  |                 |
|                                                 | <i>(n=50)</i>           | <i>(n=91)</i>         | <i>(n=46)</i>   | <i>(n=14)</i>  | <i>(n=201)</i>  |
| <b>CONSULTATION AT THE MEDICAL OFFICE</b>       |                         |                       |                 |                |                 |
| <i>number of patients (% of total patients)</i> | 0                       | 4 (4%)                | 3 (6%)          | 1 (7%)         | 8 (4%)          |
| <i>number of contacts (total)</i>               | 0                       | 6                     | 3               | 1              | 10              |
| <i>mean ±SD</i>                                 | -                       | 1.5±0.6               | 1               | -              | 1.3±0.4         |
| <i>min-max</i>                                  | -                       | 1-2                   | 1-1             | -              | 1-2             |
| <b>CONSULTATION BY HOME VISIT</b>               |                         |                       |                 |                |                 |
| <i>number of patients (% of total patients)</i> | 1 (2%)                  | 0                     | 1 (2%)          | 0              | 2 (1%)          |
| <i>number of contacts (total)</i>               | 1                       | 0                     | 1               | 0              | 2               |
| <i>mean ±SD</i>                                 | -                       | -                     | -               | -              | 1               |
| <i>min-max</i>                                  | -                       | -                     | -               | -              | 1-1             |
| <b>Emergency services</b>                       |                         |                       |                 |                |                 |
| <i>number of patients (% of total patients)</i> | 0                       | 3 (3%)                | 0               | 0              | 3 (2%)          |
| <b>Hospitalization</b>                          |                         |                       |                 |                |                 |
| <i>number of patients (% of total patients)</i> | 1 (2%)                  | 1 (1%)                | 0               | 0              | 2 (1%)          |
| <b>Drugs</b>                                    |                         |                       |                 |                |                 |
| <b>TOTAL DRUGS TAKEN</b>                        |                         |                       |                 |                |                 |
| <i>number of patients (% of total patients)</i> | 45 (90%)                | 86 (94%)              | 42 (91%)        | 13 (93%)       | 186 (93%)       |
| <b>ANTIBIOTICS</b>                              |                         |                       |                 |                |                 |
| <i>number of patients (% of total patients)</i> | 8 (16%)                 | 14 (15%)              | 9 (19%)         | 7 (50%)        | 38 (19%)        |
| <b>ANTIVIRALS</b>                               |                         |                       |                 |                |                 |
| <i>number of patients (% of total patients)</i> | 9 (18%)                 | 15 (16%)              | 14 (30%)        | 2 (14%)        | 40 (20%)        |
| <b>OTHERS</b>                                   |                         |                       |                 |                |                 |
| <i>number of patients (% of total patients)</i> | 45 (90%)                | 84 (92%)              | 42 (91%)        | 13 (93%)       | 184 (92%)       |
| <b>Additional tests</b>                         |                         |                       |                 |                |                 |
| <i>number of patients (% of total patients)</i> | 4 (8%)                  | 5 (5%)                | 5 (11%)         | 2 (14%)        | 16 (8%)         |
| <b>Paramedical care</b>                         |                         |                       |                 |                |                 |
| <i>number of patients (% of total patients)</i> | 0                       | 0                     | 0               | 0              | 0               |

|                                                 | <i>Younger children</i> | <i>Older children</i> | <i>Adults</i>   | <i>Elderly</i> | <i>All ages</i> |
|-------------------------------------------------|-------------------------|-----------------------|-----------------|----------------|-----------------|
|                                                 | <i>0-4 yo</i>           | <i>5-14 yo</i>        | <i>15-64 yo</i> | <i>≥65 yo</i>  |                 |
|                                                 | <i>(n=50)</i>           | <i>(n=91)</i>         | <i>(n=46)</i>   | <i>(n=14)</i>  | <i>(n=201)</i>  |
| <b>Sick leave (from work)</b>                   |                         |                       |                 |                |                 |
| <i>number of patients (% of total patients)</i> | -                       | -                     | 27 (59%)        | 0              | 27 (13%)        |
| <i>average duration (days±SD)</i>               | -                       | -                     | 6.5±5.4         | 0              | 6.5±5.4         |
| <i>min-max</i>                                  | -                       | -                     | 1-24            | 0              | 1-24            |

yo: years old
